# Supplementary material
Source: PubMed Central journal article supplement (PMC6199476)
Supplement: zjb022184907s1.pdf [file zjb022184907s1.pdf]

## SUPPLEMENTARY MATERIALS

PA5339, a RidA homolog, is required for full growth in *Pseudomonas aeruginosa*

Jessica Irons, Kelsey M. Hodge-Hanson<sup>1</sup> and Diana M. Downs\*

Department of Microbiology  
University of Georgia  
Athens, GA 30602-2605

\*Correspondence: Dr. Diana Downs, Department of Microbiology, University of Georgia, Athens, GA, USA, [dmdowns@uga.edu](mailto:dmdowns@uga.edu)

<sup>1</sup>Current address: Department of Microbiology & Immunology, Loyola University Chicago, Maywood, IL

RUNNING TITLE: 2-aminoacrylate stress in *P. aeruginosa*

KEYWORDS: RidA, PA5339, motility, biofilm, 2-aminoacrylate,

| Primer Name | Gene to amplify | Plasmid        | Sequence                                                             |
|-------------|-----------------|----------------|----------------------------------------------------------------------|
| PR863       | PA5339          | NA             | CGAGTACCGCATGGAAGTCT                                                 |
| PR864       | PA5339          | NA             | CCCATGATCTCGTTGACCTT                                                 |
| PR857       | PA3123          | NA             | GCCATGAGCACCAACTACCT                                                 |
| PR858       | PA3123          | NA             | GTCGATATGAGCCAGGGTTG                                                 |
| PR851       | PA0814          | NA             | GCTGTTGGAACCGTATTCGT                                                 |
| PR852       | PA0814          | NA             | CGACAGAGGACGAGGAAGTC                                                 |
| PR869       | PA1568          | NA             | GTATAGAGGGTGCCGTCCAG                                                 |
| PR870       | PA1568          | NA             | GCTGTTTCATGATGGGACTGA                                                |
| PR871       | PA5303          | NA             | CTCATCATCACGATCTTCGC                                                 |
| PR872       | PA5303          | NA             | CCAGCACACTAACGAGCGTA                                                 |
| PR923       | Sequencing      | pMQ72 F        | CCGCCAAAACAGCC                                                       |
| PR924       | Sequencing      | pMQ72 R        | ACCCGTTTTTTTGGGCT                                                    |
| Universal   | Sequencing      | pBAD F         | ATGCCATAGCATTTCATCC                                                  |
| Universal   | Sequencing      | pBAD R         | GATTTAATCTGTATCAGG                                                   |
| PR1037      | LT2 ridA        | pMQ72-ridA F   | ccaagcttgcctgcaggtcgactctagaggat<br>ccccTTAGCGACGAACAGCGA            |
| PR1038      | LT2 ridA        | pMQ72-ridA R   | taccggttttttgggctagcgaattcgagctcggtagc<br>cCATTATGTGGTGTGCTGGCC      |
| PR897       | PA5339          | pMQ72-PAridA F | TACCCGTTTTTTTGGGCTAGCGAATT<br>CGAGCTCGGTACCCGATTCAGCAA<br>GGAGTTCCC  |
| PR898       | PA5339          | pMQ72-PAridA R | CCAAGCTTGCATGCCTGCAGGTCTGA<br>CTCTAGAGGATCCCCTTACTCGAGG<br>ACGACGATG |
| PR1033      | PA3123          | pMQ72-PA3123 F | ccaagcttgcctgcaggtcgactctagaggat<br>ccccCTCAGCCCTCGCCGACCCACG<br>CC  |
| PR1034      | PA3123          | pMQ72-PA3123 R | taccggttttttgggctagcgaattcgagctcggtagc<br>cCGCAGTGCTACATGAATACGC     |
| PR917       | PA5083          | pMQ72-dguB F   | TACCCGTTTTTTTGGGCTAGCGAATT<br>CGAGCTCGGTACCCCCCTCGACTG<br>GAGCACTCC  |
| PR918       | PA5083          | pMQ71-dguB R   | CCAAGCTTGCATGCCTGCAGGTCTGA<br>CTCTAGAGGATCCCCtcaGCCCTGG<br>CCGC      |
| PR978       | pBAD24-PA5339 F | PA5339         | NNGCTCTTCNTTCATGACCAAGACC<br>GTTATCCAC                               |
| PR979       | pBAD24-PA5339 R | PA5339         | NNGCTCTTCNTTACTCGAGGACGAC<br>GATGG                                   |
| PR976       | pBAD24-PA3123 F | PA3123         | NNGCTCTTCNTTCATGAGCGATGAC<br>ATCCAGCGTTA                             |

|        |                 |        |                                          |
|--------|-----------------|--------|------------------------------------------|
| PR977  | pBAD24-PA3123 R | PA3123 | NNGCTCTTCNTTAGCCCTCGCCGAC<br>CCA         |
| PR503  | pBAD24-PA0814 F | PA0814 | NNGCTCTTCNTTCATGCAGACATCC<br>CCCGCTCCG   |
| PR504  | pBAD24-PA0814 R | PA0814 | NNGCTCTTCNTTATCATGGCCGCAC<br>CGCCGC      |
| PR1020 | pBAD24-PA1568 F | PA1568 | NNGCTCTTCNTTCATGCATATCGAA<br>CGTTTCGAAGT |
| PR1021 | pBAD24-PA1568 R | PA1568 | NNGCTCTTCNTTATCACTGCGGGCG<br>GGC         |
| PR1022 | pBAD24-PA5303 F | PA5303 | NNGCTCTTCNTTCATGCCCATCCAG<br>CGCCAG      |
| PR1023 | pBAD24-PA5303 R | PA5303 | NNGCTCTTCNTTATCAGGGCAGCGC<br>AGCGAC      |
| PR729  | pBAD-PA5083 F   | PA5083 | NNGCTCTTCNTTCATGGAACCGACC<br>CGTATCG     |
| PR730  | pBAD-PA5083 R   | PA5083 | NNGCTCTTCNTTATCAGCCCCTGGC<br>CGCCAC      |

**Table S1: List of primers used in this study**

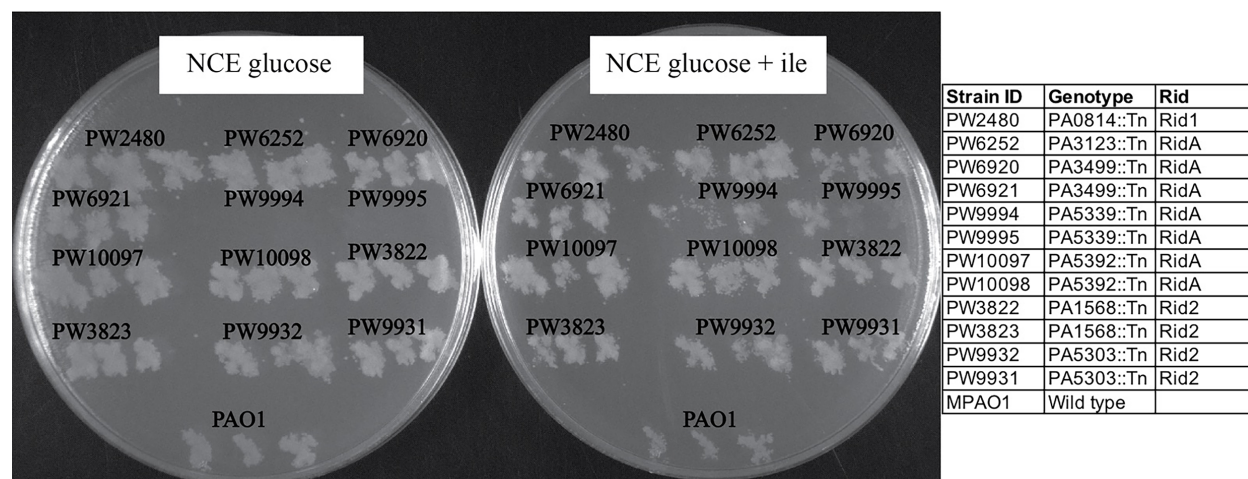

**Figure S1: Only PA5339::Tn mutants have a growth defect under conditions tested.** Mutants were streaked from frozen glycerol stocks to LB agar. Single colonies were patched in triplicate to LB agar and incubated four hours at 37°C. The LB agar plate was replica printed to NCE/glucose (11 mM) and NCE/glucose/isoleucine (0.3 mM). Only PW9994 and PW9995 (PA5339:Tn) strains had a growth defect on NCE/glucose, which was corrected with the addition of isoleucine.

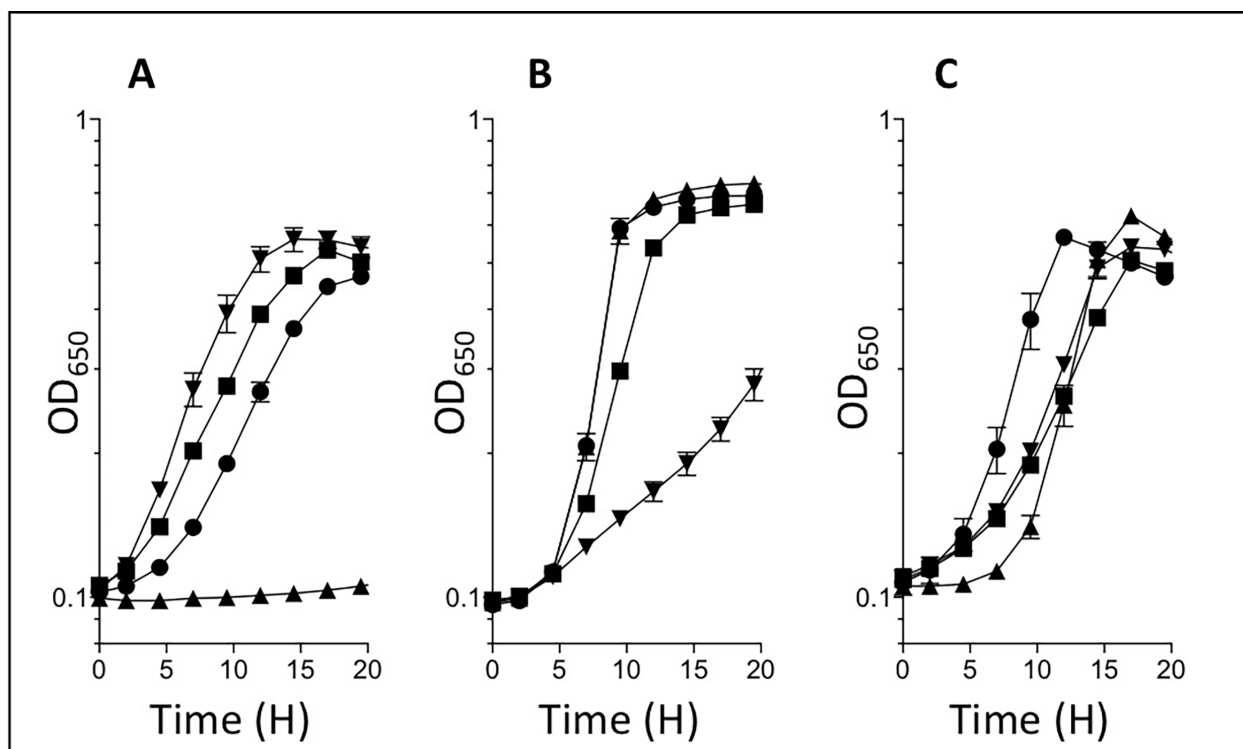

**Figure S2: Sensitivity to serine differs among organisms lacking *RidA*.** All organisms were grown in 20 mM glycerol +/- the addition of 3 mM serine and 0.2% arabinose (to induce *ilvA219* in *E. coli* chromosomal construct). The addition of 3 mM serine caused varying growth defects, suggesting 2AA sensitivity (from serine) differs in each organism. Historically, in minimal medium, 5 mM serine has been used to cause a growth defect in *S. enterica ridA* and *E. coli ilvA219 ΔridA ΔtdcF* mutants (1). These data show, in minimal medium with glycerol, 3 mM serine completely inhibits growth of a *P. aeruginosa pAridA:Tn* mutant (A), partially inhibits growth of the *S. enterica ridA::MudJ* mutant (B), and does not inhibit growth of the *E. coli ilvA219 ΔridA ΔtdcF* mutant (C).

- A) *P. aeruginosa pAridA:Tn* mutants: circles--DM15943 (pEmpty vector) glycerol only, squares--DM15944 (pPA5339) glycerol only, triangles--DM15943 glycerol/serine, inverted triangles--DM15944 glycerol/serine
- B) *S. enterica*: circle--wildtype in glycerol, squares--*ridA::MudJ* in glycerol, triangles--wildtype in glycerol/serine, inverted triangles--*ridA::MudJ* in glycerol/serine.
- C) *E. coli*: circles--DM14931 (*ilvA219*) in glycerol, squares—DM15055 (*ilvA219 ΔridA ΔtdcF*), triangles-- DM14931 in glycerol/serine, inverted triangles—DM15055 in glycerol/serine.

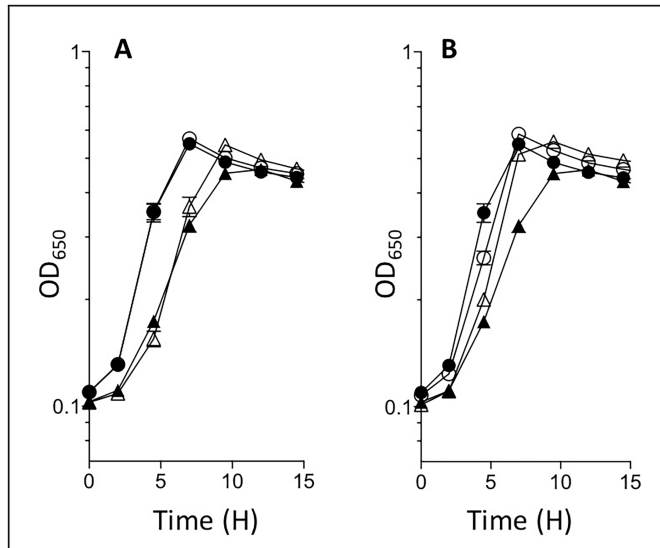

**Figure S3: Growth of a *PARIDA::Tn* mutant is improved by threonine but not glycine.**

A) Growth in minimal medium with 11 mM glucose (closed symbols), PAO1/WT (circles), PW9994 *PARIDA::Tn* mutant (triangles), and with exogenous 1 mM glycine (open symbols). C) Growth in minimal medium with 11 mM glucose (closed symbols), PAO1/WT (circles), PW9994 *PARIDA::Tn* mutant (triangles), and with exogenous 1 mM threonine (open symbols). The error bars represent standard errors of the mean from three biological replicates.

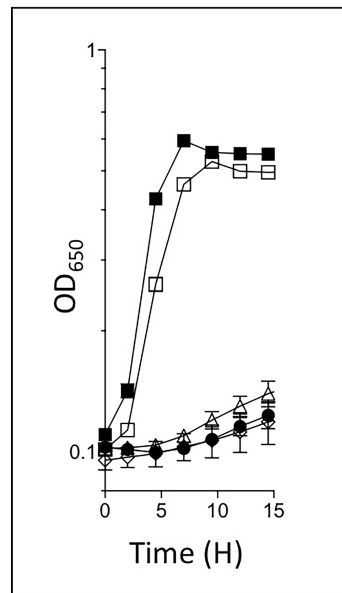

**Figure S4: Growth of a *PARIDA::Tn* mutant is restored by *SERIDA* or *PARIDA* in trans.**

Expression of *SERIDA* or *PARIDA* in trans, DM16328 (squares) or DM15944 (open square), respectively, supported growth of the *PARIDA::Tn* mutant in minimal medium with 11 mM glucose and 5 mM serine. The empty vector control in DM15943 (circles), or expression of Rid family members, PA5083 in DM16443 (open diamonds), or PA3123 in DM16327 (open triangles) did not support growth of the *PARIDA::Tn* mutant. The error bars represent standard errors of the mean from three biological replicates.

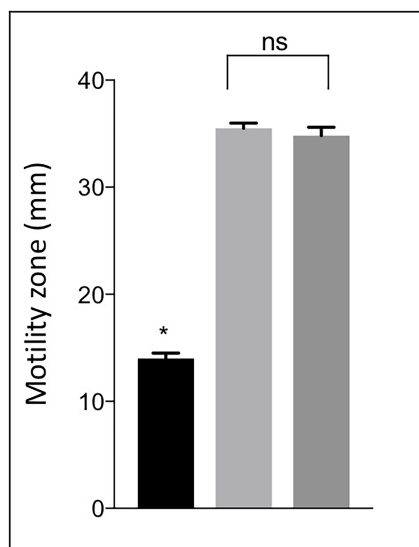

**Figure S5: Motility of PAO1 and the complemented *paridA::Tn* mutant are similar.**

Diameter of motility was measured after 24 hours in minimal NCE glucose medium. There is a significant difference in motility diameter of DM15943 (black bar) as compared to DM15944 or PAO1. There is no significant difference between the motility of DM15944 (*paridA::Tn/paridA*) and PAO1. Significance was determined by Students test and a P values <0.005.

Literature Cited.

1. Borchert AJ, Downs DM. 2017. The Response to 2-Aminoacrylate Differs in Escherichia coli and Salmonella enterica, despite Shared Metabolic Components. J Bacteriol 199.
